# Supplementary material for: Single-cell transcriptomics reveal intrinsic and systemic T cell aging in COVID-19 and HIV
Source: publisher site journal article supplement (doi:10.18632/aging.206353), 2026-02-08
Supplement: Supplementary file [file aging-v18i1-206353-supplementary-material-SD1.pdf]

## SUPPLEMENTARY FIGURES

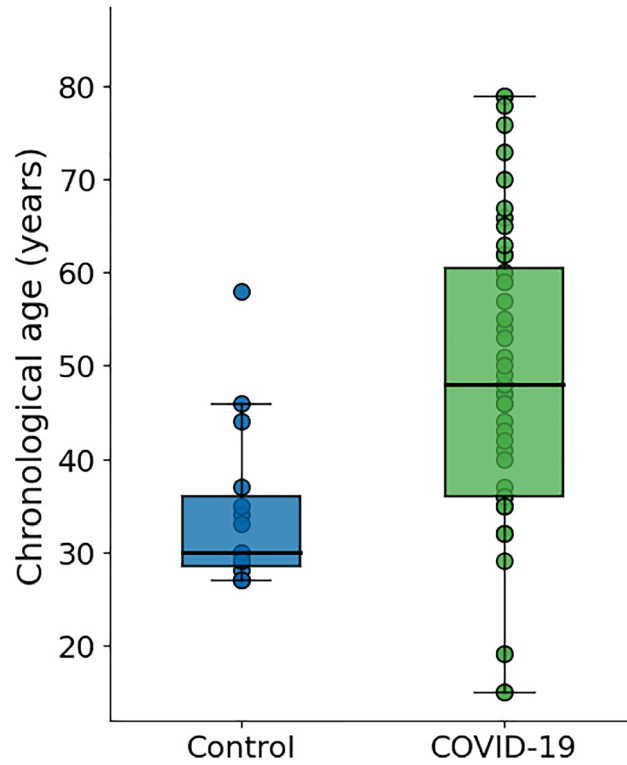

**Supplementary Figure 1. Chronological age distributions of COVID-19 and control donors.** A donor-level comparison of chronological ages for patients with COVID-19 and healthy controls from the Ren et al. dataset after applying quality filters. Each point represents one donor, with boxplots summarizing the age distribution within each group. COVID-19 donors were significantly older than controls ( $p = 6.44 \times 10^{-5} ***$ ), confirming that chronological age differs between groups.

**A**  
Naive Cytotoxic T Cells

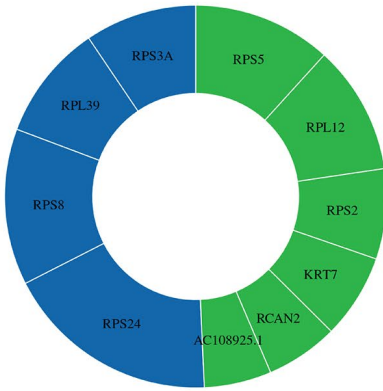

**B**  
Naive Helper T Cells

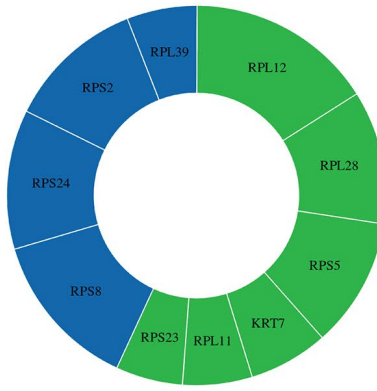

**C**  
Memory Cytotoxic T Cells

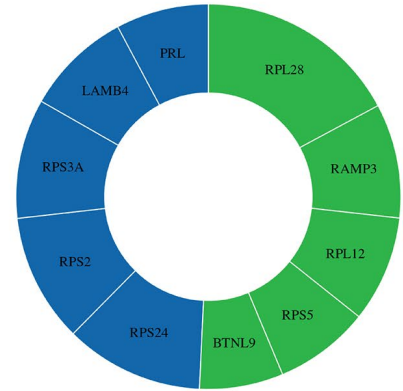

**D**  
Memory Helper T Cells

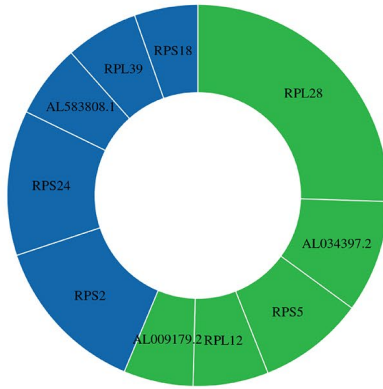

**E**  
Effector Cytotoxic T Cells

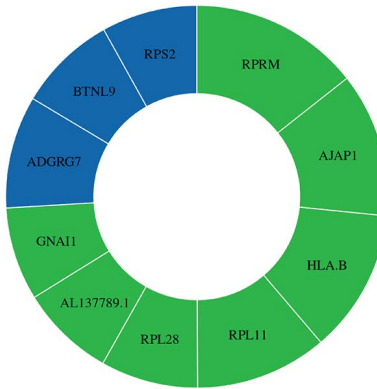

**F**  
Regulatory T Cells

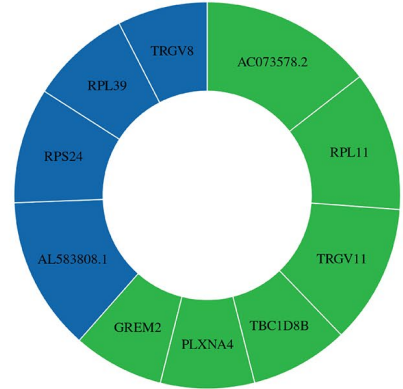

**Supplementary Figure 2. Gene contributions across T cell type-specific age prediction models.** (A–F) Donut plots illustrating the top ten most influential gene coefficients for each T cell type-specific age prediction model: (A) naïve cytotoxic, (B) naïve helper, (C) memory cytotoxic, (D) memory helper, (E) effector cytotoxic, and (F) regulatory. Upregulated genes are shown in green and downregulated genes in blue. Gene size reflects the relative magnitude of the model coefficient, highlighting the primary drivers of age prediction within each T cell subset.



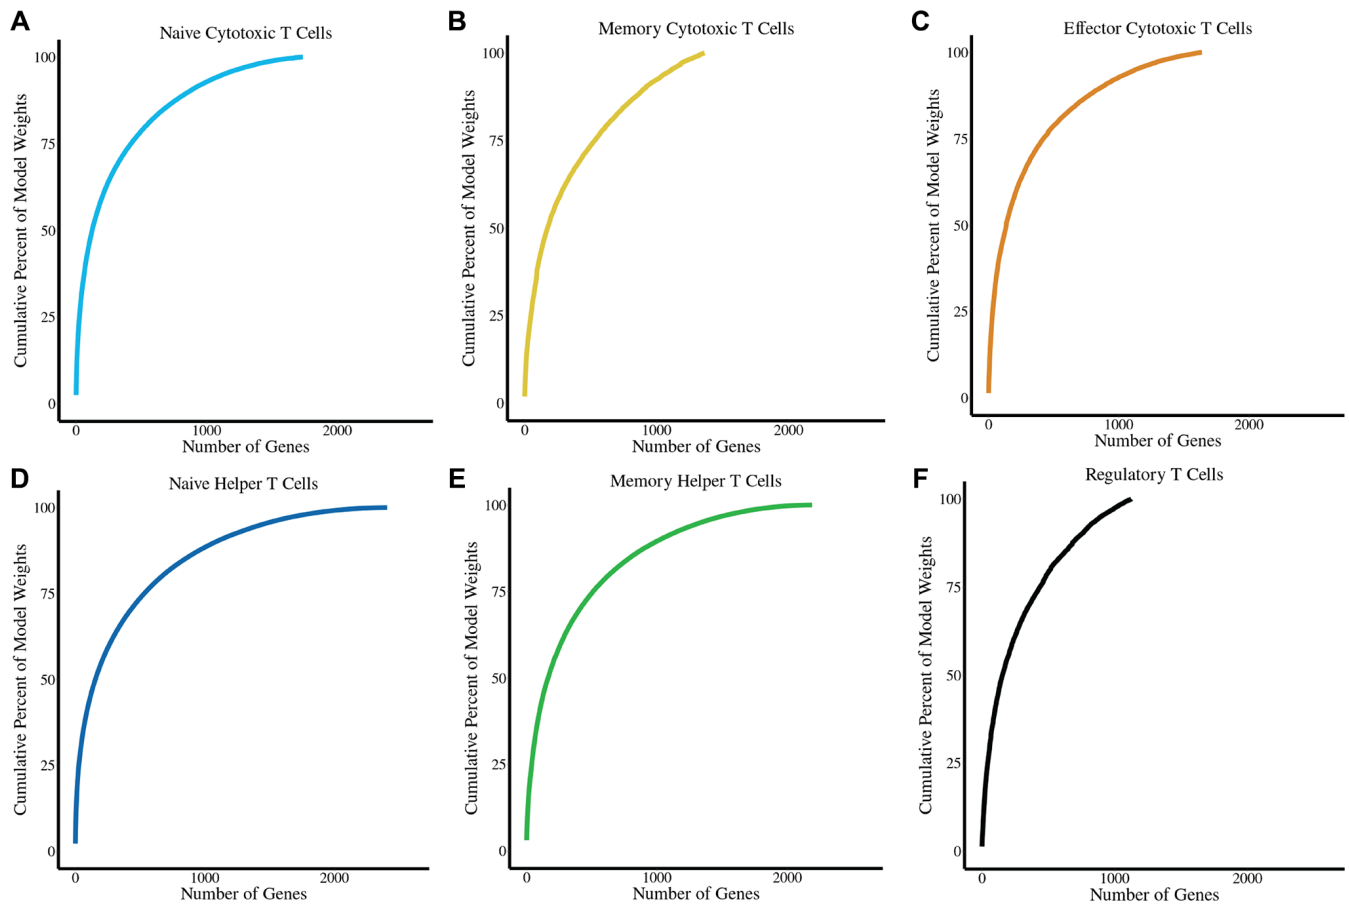

**Supplementary Figure 4. Distribution of model weights across genes.** (A–F) Cumulative distribution functions showing how age prediction model weights are distributed across all genes for each T cell subset: (A) naïve cytotoxic, (B) memory cytotoxic, (C) effector cytotoxic, (D) naïve helper, (E) memory helper, and (F) regulatory. Each curve represents the cumulative proportion of total model weight explained as genes are ranked by absolute coefficient magnitude, illustrating differences in weight concentration across T cell-specific aging models.

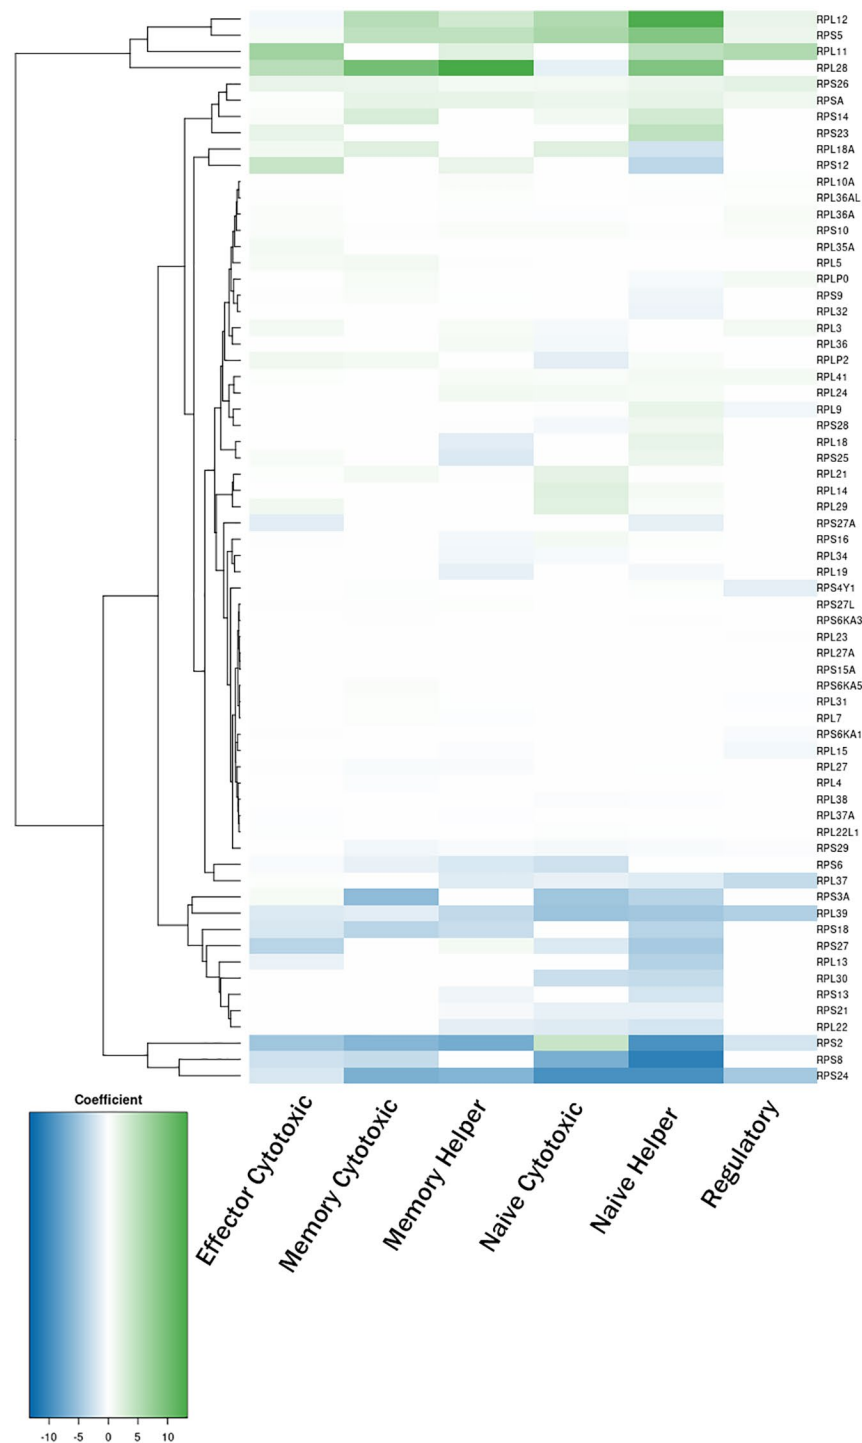

**Supplementary Figure 5. Ribosomal gene coefficients across T cell subsets.** Heatmap depicting the age prediction coefficients assigned to ribosomal genes for each T cell subset in the Terekhova et al. (2023) dataset. The heatmap reveals patterns of ribosomal gene contributions to age prediction across different T cell types.

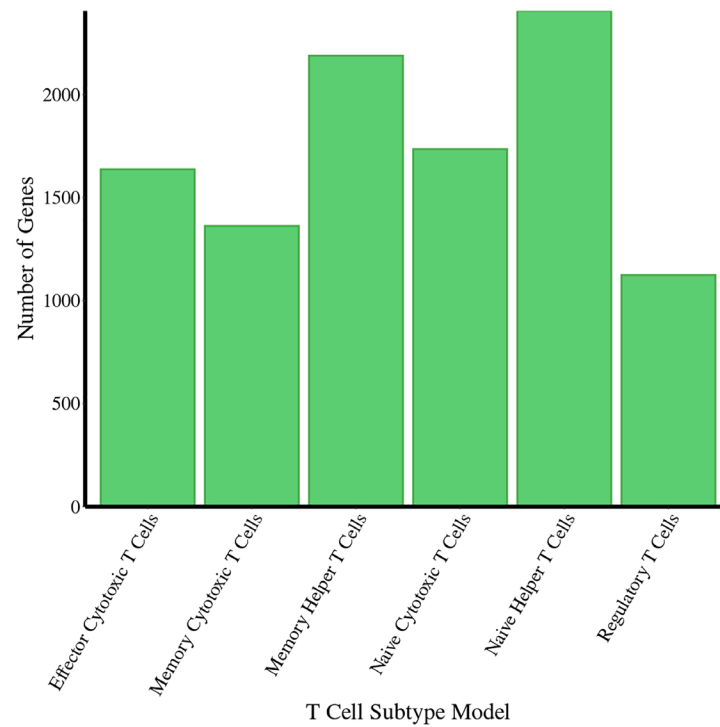

**Supplementary Figure 6. Quantified genes for T cell age prediction models.** The number of genes unique to each of the six T cell subset age prediction models after training.
